# Supplementary material
Source: MDPI journal article supplement (https://www.mdpi.com/1999-4907/6/2/293)
Supplement: s1 [file s1]

Supplementary Information

**Table S1.** List of the most prevalent current tree taxa (dbh >10 cm) per site and zone.
For each site, taxa present inside and outside the patch are in bold face. The most prevalent taxa are presented so that their cumulative relative density reaches 33% (ranked by decreasing densities).

| **Zone** | **Site** | **Most Prevalent Taxa** |
| --- | --- | --- |
| Inside patches | Site 1 | ***Strombosia pustulata****, Duboscia macrocarpa, Pericopsis elata,  Trichilia dregeana, Tabernaemontana crassa,* ***Polyalthia suaveolens*** |
| Site 2 | ***Polyalthia suaveolens****, Trichilia dregeana,* ***Desbordesia glaucescens****, P. elata, Tabernaemontana crassa, Terminalia superba* |
| Site 3 | *Duboscia macrocarpa,* ***Polyalthia suaveolens****, Antidesma membranaosum, Pausinystalia macroceras, P. elata, Anonidium mannii* |
| Outside patches | Site 1 | *Trichilia dregeana,* ***Strombosia pustulata****,* ***Polyalthia suaveolens****,  Macaranga burifolia, Desbordesia glaucescens, Drypetes preussii* |
| Site 2 | ***Desbordesia glaucescens****,* ***Polyalthia suaveolens****, Afrostyrax lepidophyllus, Duboscia macrocarpa* |
| Site 3 | *Desbordesia glaucescens, Strombosia pustulata,* ***Polyalthia suaveolens****, Tabernaemontana crassa, Afrostyrax lepidophyllus* |

**Table S2.** Woody taxa identified from subsurface charcoal fragments and their geographical distribution in the modern flora in the Congo Basin (following [29]). Charcoal was collected in the study area (southeastern Cameroon). The probability of charcoal identification considers here two categories, very good probability and good probability, based on the natural range and the habitat (forest, savannah, *etc.*) of the
taxa [34]. Taxa with low probabilities have been removed from the database. Types were defined following [34].

| **Type** | **Number of Charcoal Fragments Assigned to the Types** | **Species** | **Family** | **Current Distribution** | **Probability of Right Identification** |
| --- | --- | --- | --- | --- | --- |
| ANN POL SUA | 4 | *Polyalthia suaveolens* | Annonaceae | Centro-Guineo-Congolian | Very good probability |
| *Uvariastrum zenkeri* | Annonaceae | Lower Guinean | Good probability |
| EBE DIO PIS | 1 | *Diospyos piscatoria* | Ebenaceae | Lower and upper Guinean | Good probability |
| *Diospyos sanza-minika* | Ebenaceae | Lower and upper Guinean | Good probability |
| CAE STE MIC | 8 | *Stemonocoleus micranthus* | Caesalpiniaceae | Lower and upper Guinean | Very good probability |
| *Turraeanthus africanus* | Meliaceae | Sub-Guineo-Congolian | Good probability |
| *Deinbollia* spp. | Sapindaceae | Afro-Malagasy | Good probability |
| *Dacryodes igaganga* | Burseraceae | Gabon | Good probability |
| *Dacryodes normandii* | Burseraceae | Gabon | Good probability |
| *Newtonia leucocarpa* | Mimosaceae | Centro-Guineo-Congolian | Good probability |
| OLA OLA SUB | 1 | *Olax* spp. | Olacaceae | Omni-Guineo-Congolian | Good probability |
| APO ALS BOO | 1 | *Alstonia boonei* | Apocynaceae | Transitional | Good probability |
| *Turraeanthus africanus* | Meliaceae | Omni-Guineo-Congolian | Good probability |
| *Schrebera arborea* | Oleaceae | Omni-Guineo-Congolian | Good probability |
| LEP LEP STA | 1 | *Lepidobotrys staudtii* | Lepidobotryaceae | Centro-Guineo-Congolian | Very good probability |
| TIL DUB MAC | 6 | *Homalium* cf*. longistylum* | Flacourtiaceae | Transitional | Good probability |
| *Duboscia macrocarpa* | Tiliaceae | Centro-Guineo-Congolian | Very good probability |
| *Drypetes gossweileri* | Euphorbiaceae | Centro-Guineo-Congolian | Good probability |
| *Psydrax arnoldiana* | Rubiaceae | Omni-Guineo-Congolian | Good probability |
| Unidentified | Rubiaceae | * |  |
| *Dictyandra arborescens* | Rubiaceae | Sub-Guineo-Congolian | Good probability |
| *Suregada* spp. | Euphorbiaceae | * |  |

**Table S2.** *Cont.*

| **Type** | **Number of Charcoal Fragments Assigned to the Types** | ***Species*** | **Family** | **Current Distribution** | **Probability of Right Identification** |
| --- | --- | --- | --- | --- | --- |
| EBE DIO CRA | 1 | *Diospyos crassiflora* | Ebenaceae | Centro-Guineo-Congolian | Good probability |
| *Streblus usambarensis* | Moraceae | Transitional | Good probability |
| *Olax* spp. | Olacaceae | Omni-Guineo-Congolian | Good probability |
| Unidentified | Dipterocarpaceae | * |  |
| *Streblus usambarensis* | Moraceae | Transitional | Good probability |
| RUB COR PAC | 2 | *Corynanthe pachyceras* | Rubiaceae | Lower and upper Guinean | Good probability |
| ANN MON | 1 | *Monodora* spp. | Annonaceae | Transitional | Good probability |
| FLA SCO COR | 2 | *Scottellia coriacea* | Flacourtiaceae | Omni-Guineo-Congolian | Good probability |
| *Strombosia grandifolia* | Olacaceae | Omni-Guineo-Congolian | Good probability |
| *Microdesmis puberula* | Pandaceae | Omni-Guineo-Congolian | Good probability |

* Information regarding the species is not accurate enough to determine the current distribution.
